# Supplementary material for: Early maturation and hyperexcitability is a shared phenotype of cortical neurons derived from different ASD-causing mutations
Source: Research Square preprint supplement (doi:10.21203/rs.3.rs-2358557/v1), 2023-01-04
Supplement: Supplementary file 2 [file 5e2f348cc7c61db2429747d8.docx]

**Table S2.** A description of the patients' cohort

| **Patient ID** | **Mutation** | **Sex** | **Age at sampling (Y)** | **Clinical symptoms** |
| --- | --- | --- | --- | --- |
| UOHi011 | Dup7 | M | 7.5 | ASD, minor ID |
| UOHi010 | Control | M | 39 | - |
| 784313 | GRIN2B | F | 2 | ASD, ID |
| UOHi010 | Control | M | 39 | - |
| UOHi003-A | SHANK3 | F | 10 | ASD, ID |
| UOHi002-A | Control | F | 47 | - |
| UOHi004 | UBTF | F | 22 | ASD, ID |
| UOHi005 | Control | F | 50 | - |
