# Supplementary material for: Early maturation and hyperexcitability is a shared phenotype of cortical neurons derived from different ASD-causing mutations
Source: Research Square preprint supplement (doi:10.21203/rs.3.rs-2358557/v1), 2023-01-04
Supplement: Supplementary file 3 [file 8137c525782de9d6c16b7571.docx]

**Figure S1.** **UBTF-mutant cortical neurons display larger spontaneous firing rates and amplitudes.**

**a** The mean rate of spontaneous action potentials was significantly higher in UBTF-mutant neurons compared to control neurons (p = 0.013). **b** The mean amplitude of spontaneous action potentials in UBTF-mutant neurons was larger compared to control neurons (p = 0.012).
