# Supplementary material for: Early maturation and hyperexcitability is a shared phenotype of cortical neurons derived from different ASD-causing mutations
Source: Research Square preprint supplement (doi:10.21203/rs.3.rs-2358557/v1), 2023-01-04
Supplement: Supplementary file 4 [file b44fd4828121c9d549636eac.docx]

**Table S1.** Spike shape analysis (non-parametric statistical tests: Wilcoxon signed rank test) of mutant and control cortical neurons.

|  | **Dup7** | **GRIN2B** | **SHANK3** | **UBTF** |
| --- | --- | --- | --- | --- |
| **Spike Threshold** | µmutant =27.6 + 6.5 mV  µCtl =21.09 + 12.05 mV | µmutant=21.5 + 3.6 mV  µCtl=22.2 + 6.7 mV | µmutant=30.4 + 5.6 mV  µCtl=25.5 + 4.2 mV | µmutant=32.1 + 4.9 mV  µCtl=21.5 + 16.7 mV |
| P = 0.29 | P = 0.27 | **P = 0.02 *** | P = 0.07 |
| **Spike Height** | µmutant=25.4 + 15.5 mV  µCtl=27.6 + 19.4 mV | µmutant=41.2 + 12.5 mV  µCtl=20.5 + 14.01 mV | µmutant=44.3 + 11.4 mV  µCtl=34.4 + 7.5 mV | µmutant=50 + 17.05mV  µCtl=36.04 + 18.01 mV |
| P = 0.14 | **P = 0.008 **** | P = 0.09 | **P = 0.03 *** |
| **Spike width** | µmutant =3.2 + 3.4 ms  µCtl =2.4 + 3.4 ms | µmutant=8.3 + 5.8 ms  µCtl=27.6 + 19.4 ms | µmutant=6.5 + 5.9 ms  µCtl=5.9 + 1.2 ms | µmutant=3.3 + 1.5 ms  µCtl=12.5 + 17.8 ms |
| P = 0.7 | P = 0.065 | P = 0.17 | **P = 0.003 **** |
| **Rise time** | µmutant =1.9 + 3.1 ms  µCtl =0.68 + 0.87 ms | µmutant=7.2 + 5.1 ms  µCtl=3.6 + 1.9 ms | µmutant=4.6 + 2.6 ms  µCtl=4.6 + 1.8 ms | µmutant=2.5 + 1.6 ms  µCtl=5.2 + 5.3 ms |
| P = 0.34 | P = 0.23 | P = 0.58 | P = 0.18 |

*P<0.05, **P<0.01, ***P<0.001 and ****P<0.0001
