# Supplementary figures and images for: Early maturation and hyperexcitability is a shared phenotype of cortical neurons derived from different ASD-causing mutations
Source: Research Square preprint supplement (doi:10.21203/rs.3.rs-2358557/v1), 2023-01-04

**a**

Spontaneous firing rate

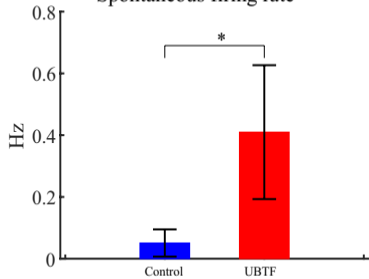**b**

Spontaneous activity Amplitude

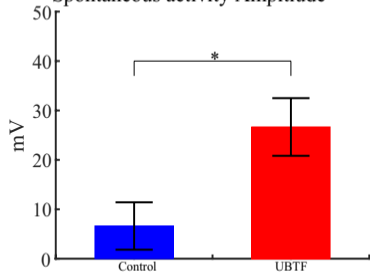

Supplement: Supplementary file 1 [file 15e062f7cc2c2aecc85af8db.pdf]
